# Supplementary material for: The Metabolic Response to a Low Amino Acid Diet is Independent of Diet-Induced Shifts in the Composition of the Gut Microbiome
Source: PubMed Central journal article supplement (PMC6329753; doi:10.1038/s41598-018-37177-3), 2019-01-11
Supplement: 41598_2018_37177_MOESM1_ESM.pdf [file 41598_2018_37177_MOESM1_ESM.pdf]

## **The Metabolic Response to a Low Amino Acid Diet is Independent of Diet-Induced Shifts in the Composition of the Gut Microbiome**

Heidi H. Pak, Nicole E. Cummings, Cara L. Green, Jacqueline A. Brinkman, Deyang Yu, Jay L. Tomasiewicz, Shany E. Yang, Colin Boyle, Elizabeth N. Konon, Irene M. Ong, Dudley W. Lamming

### **Supplemental Legends**

**Figure S1:** **A)** Bar plot of average relative abundance at the family taxonomic level. Top 10 phyla are shown. **B)** Bacterial alpha rarefaction curves calculated according to Faith's phylogenetic diversity (PD) index at the phylum taxonomic level. **C-D)** Bacterial families differentially represented in cecal contents from mice fed the specified diets for 4 months (n= 7-12/group;  $q < 0.05$ , FDR and  $* = p < 0.05$ , t-test). Error bars represent SEM.

**Figure S2: qPCR analysis of FXR-FGF15 controlled genes.** mRNA expression of the indicated genes in the livers of mice fed Control or Low AA diets was assessed by qPCR (n=7-8/group; statistics for the overall effects of gene, diet and the interaction represent the p-value from a two-way ANOVA;  $* = p < 0.05$  from a Sidak's post-test examining the effect of parameters identified as significant in the two-way ANOVA). Error bars represent SEM.

**Table S1:** List of differentially expressed genes contributing to the identification of KEGG Pathways in Figure 2.

# Figure S1

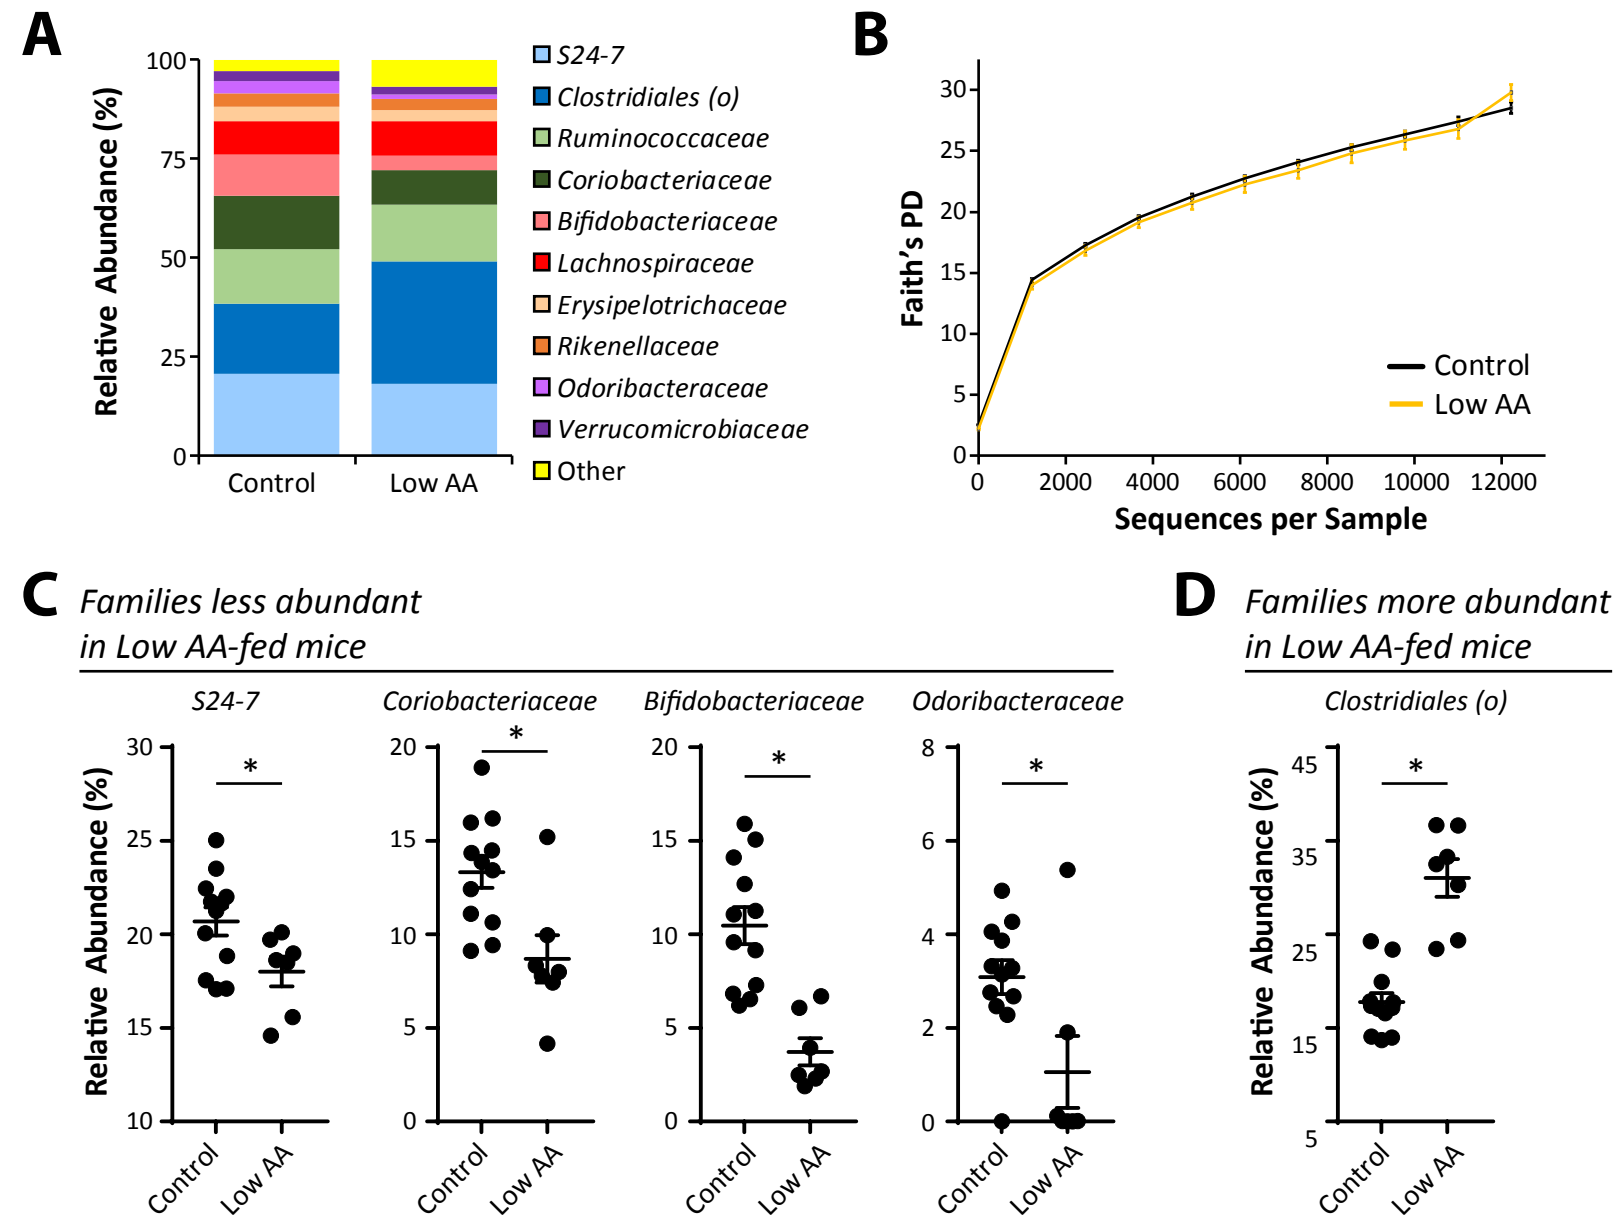

# Figure S2

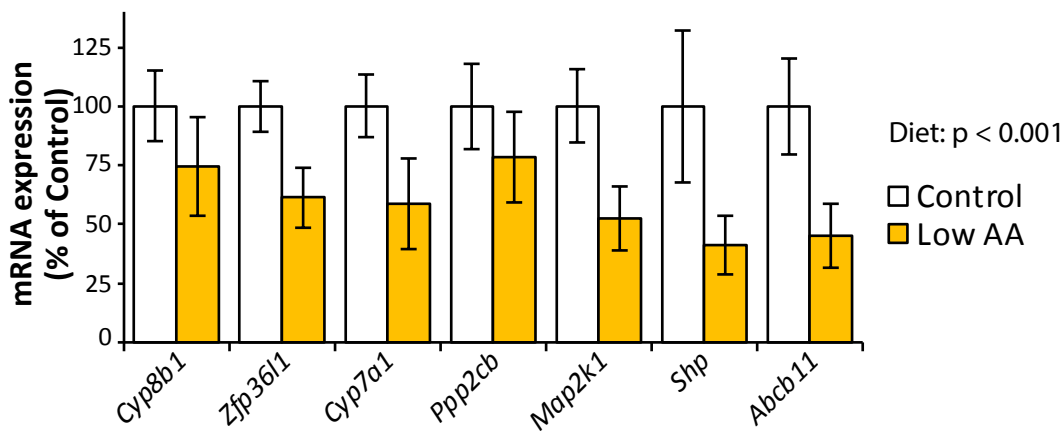

Table S1

| KEGG Pathway                                 | Gene list                                                                                                                                                                             |
|----------------------------------------------|---------------------------------------------------------------------------------------------------------------------------------------------------------------------------------------|
| Metabolism of xenobiotics by cytochrome P450 | GSTA4,UGT2B1,ENSMUSG00000038155,EPHX1,CYP2F2,UGT1A6A,UGT2B37,GSTA2,ENSMUSG00000060803,UGT2B38,UGT1A6B                                                                                 |
| Drug metabolism - cytochrome P450            | GSTA4,UGT2B1,ENSMUSG00000038155,UGT1A6A,UGT2B37,GSTA2,ENSMUSG00000060803,UGT2B38,AOX1,AOX3,UGT1A6B                                                                                    |
| Chemical carcinogenesis                      | GSTA4,UGT2B1,ENSMUSG00000038155,EPHX1,UGT1A6A,UGT2B37,GSTA2,ENSMUSG00000060803,UGT2B38,UGT1A6B                                                                                        |
| Drug metabolism - other enzymes              | UPP2,UGT2B1,UGT1A6A,CES2A,UGT2B37,CES2C,UGT2B38,UGT1A6B                                                                                                                               |
| Pentose and glucuronate interconversions     | CRYL1,UGDH,UGT2B1,UGT1A6A,UGT2B37,UGT2B38,UGT1A6B                                                                                                                                     |
| Ascorbate and aldarate metabolism            | UGDH,UGT2B1,UGT1A6A,UGT2B37,UGT2B38,UGT1A6B                                                                                                                                           |
| Retinol metabolism                           | UGT2B1,UGT1A6A,UGT2B37,UGT2B38,AOX1,AOX3,CYP4A12A,CYP4A12B,UGT1A6B                                                                                                                    |
| Steroid biosynthesis                         | SQLE,TM7SF2,CYP2R1,MSMO1                                                                                                                                                              |
| Porphyrin and chlorophyll metabolism         | UGT2B1,UGT1A6A,UGT2B37,UGT2B38,UGT1A6B                                                                                                                                                |
| Metabolic pathways                           | SRR,ETNPPL,CRYL1,DCT,SQLE,TM7SF2,UPP2,ACSS2,8DH2,UGDH,CYP2R1,ACADS8,IDO2,MSMO1,SMPD3,TREH,TKFC,UGT2B1,9130409123RIK,UGT1A6A,UGT2B37,UGT2B38,AOX1,AOX3,CYP4A12A,CYP4A12B,UGT1A6B,GCNT4 |
| Steroid hormone biosynthesis                 | UGT2B1,UGT1A6A,UGT2B37,UGT2B38,CYP2D9,UGT1A6B                                                                                                                                         |
| Prion diseases                               | C9,C6,NCAM2,PRNP                                                                                                                                                                      |
| Drug metabolism - other enzymes              | TYMP,CES2G,CES1D,UGT1A9                                                                                                                                                               |
